# Supplementary material for: Nanoparticle Delivery of Anti-inflammatory LNA Oligonucleotides Prevents Airway Inflammation in a HDM Model of Asthma
Source: PubMed Central journal article supplement — Mol Ther Nucleic Acids. 2020 Jan 14;19:1000–14. doi: 10.1016/j.omtn.2019.12.033 (PMC7013130; doi:10.1016/j.omtn.2019.12.033), 2020-01-14
Supplement: mmc1.pdf [file mmc1.pdf]

**OMTN, Volume 19**

## **Supplemental Information**

**Nanoparticle Delivery of Anti-inflammatory**

**LNA Oligonucleotides Prevents Airway**

**Inflammation in a HDM Model of Asthma**

**Sabrina C. Ramelli, Brian S. Comer, Jared M. McLendon, Lydia L. Sandy, Andrew P. Ferretti, Robert Barrington, Jeff Sparks, Majed Matar, Jason Fewell, and William T. Gerthoffer**

## Supplemental Data

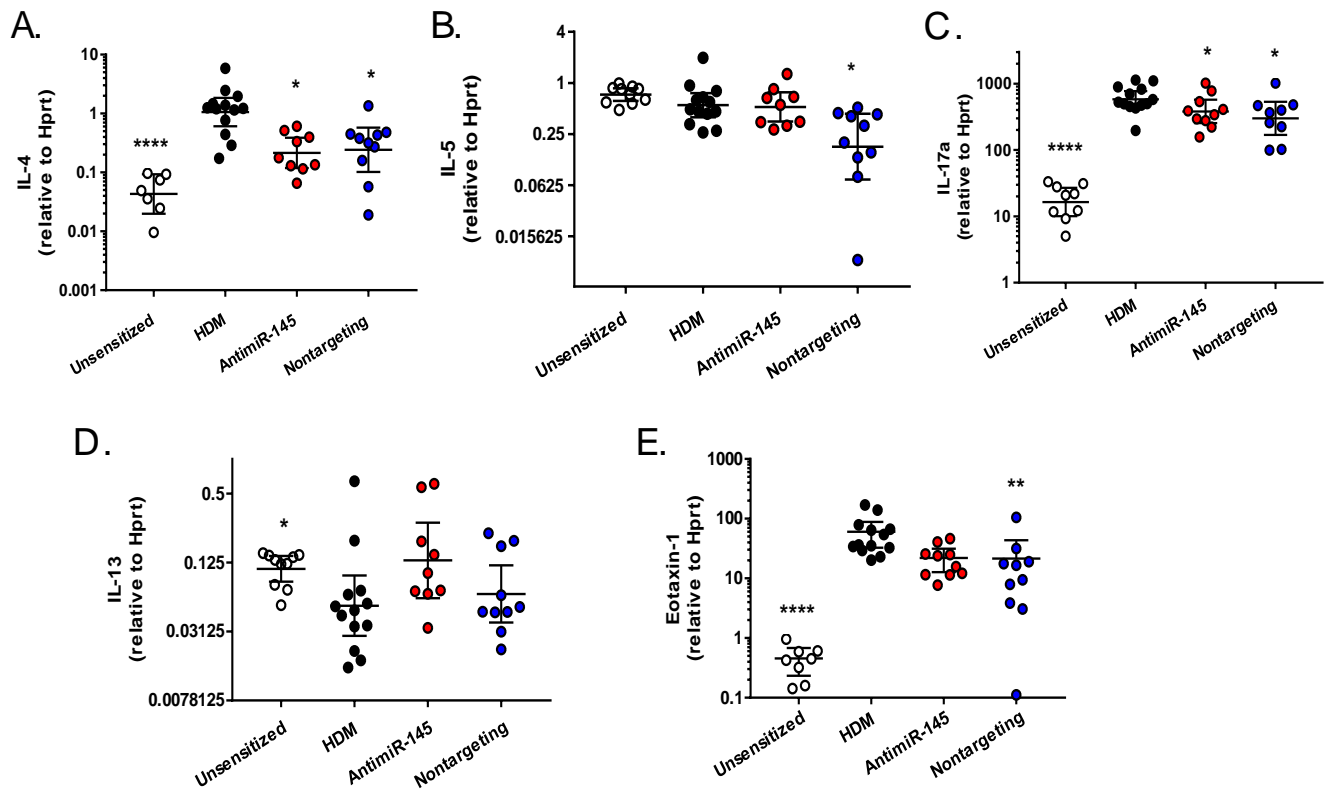

**Figure S1. AntimiR-145 reduces expression of IL-4.** qRT-PCR of isolated RNA of mouse lungs to determine the differences between treatment groups of (A) IL-4, (B) IL-5, (C) IL-13, (D) IL-17a, and (E) Eotaxin-1. Data are shown as means and 95% confidence intervals. Statistical analyses was performed by Kruskal-Wallis ANOVA with Dunn's post hoc test, \*  $p \leq 0.05$ , \*\*\*  $p \leq 0.01$ ,  $n = 9-13$ .

### A. AntimiR-145 treated

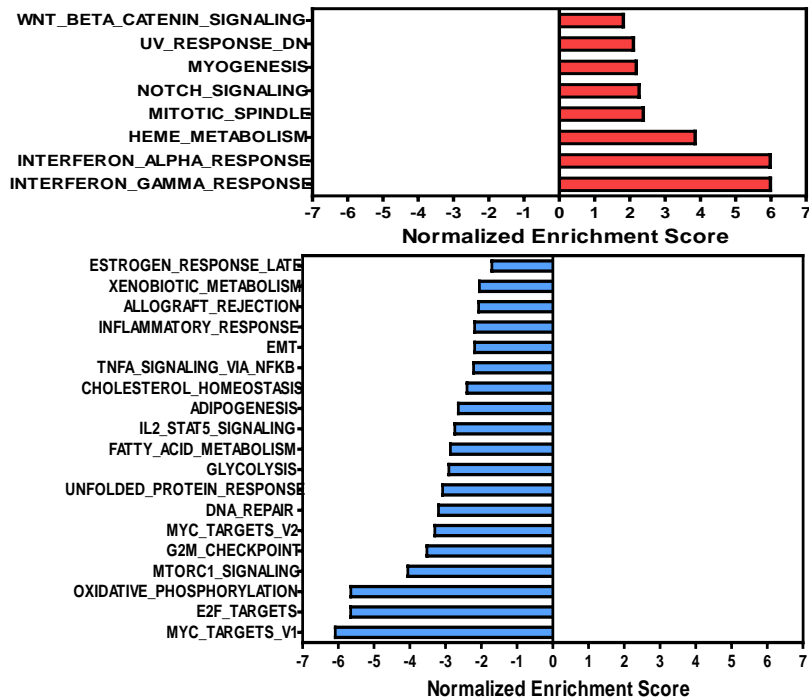

### B. Nontargeting oligonucleotide

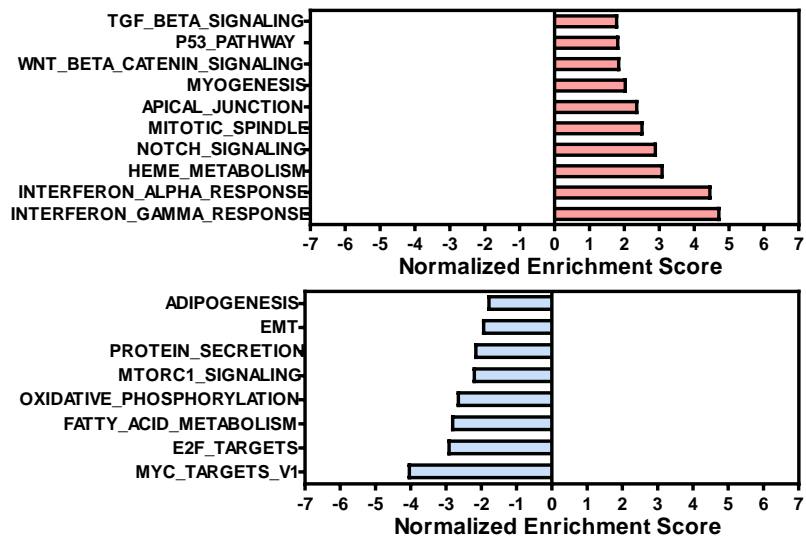

**Figure S2. HDM-enhanced expression of Hallmark pathways is differentially affected by antimiR-145 compared to nontargeting oligonucleotide.** Gene set enrichment analysis (GSEA) was performed using whole lung poly A RNA-seq data from HDM-sensitized mice treated with dextrose as the reference group. (A) Changes in signaling and metabolic pathways genes in the Hallmarks gene set of the MSigDB collection in HDM-sensitized mice treated with antimiR-145 (2 mg/kg, iv); FDR < 0.05. (B) Changes in signaling and metabolic pathways genes in HDM-sensitized mice treated with nontargeting oligonucleotide (2 mg/kg, iv); FDR < 0.05.

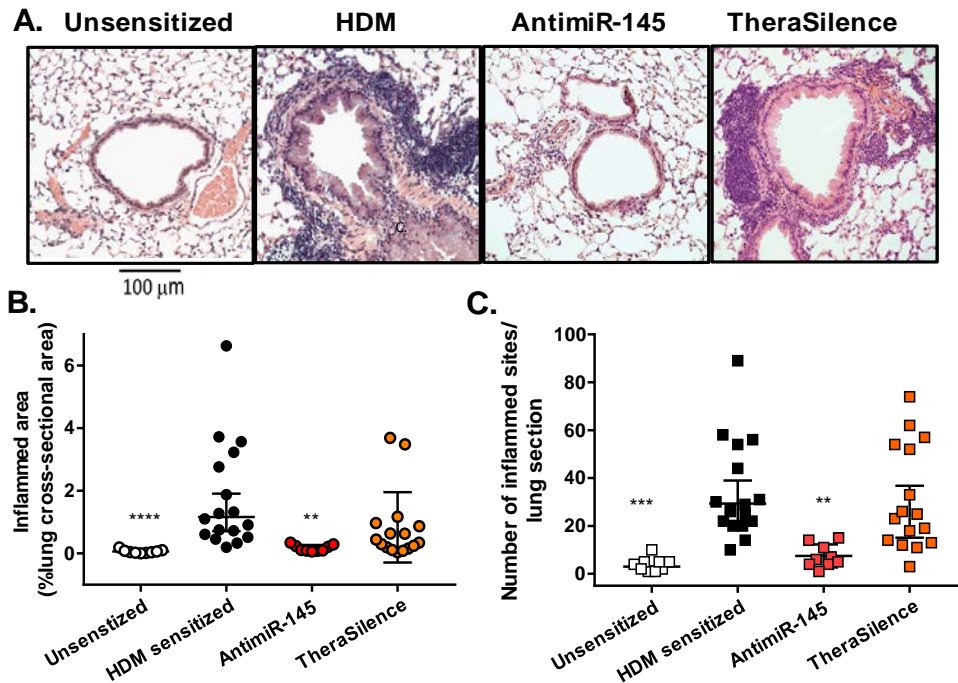

**Figure S3. TheraSilence lipid nanoparticle does not have significant effects on airway inflammation.** Paraffin embedded lung tissues were stained with (A) Hematoxylin and Eosin to identify inflammation (purple clusters). A representative micrograph for each treatment group was selected from all the airways within the treatment group. Images of Unsensitized, HDM-sensitized and antimiR145 treated lungs are duplicates of samples in Figure 6 used as reference images. (B) Volume density was quantified by inflammation area morphometry to determine differences in treatment groups. Data for Unsensitized, HDM and AntimiR-145 groups are reproduced from Figure 3A. (C) Number of inflamed sites in each treatment group. All numerical data are geometric mean  $\pm$  95% confidence intervals. Hypothesis testing was conducted by Kruskal-Wallis ANOVA and Dunn's test using HD-sensitized mice as reference group; \*\*  $p < 0.005$ , \*\*\*  $p < 0.0001$ ,  $N = 10-18$ .

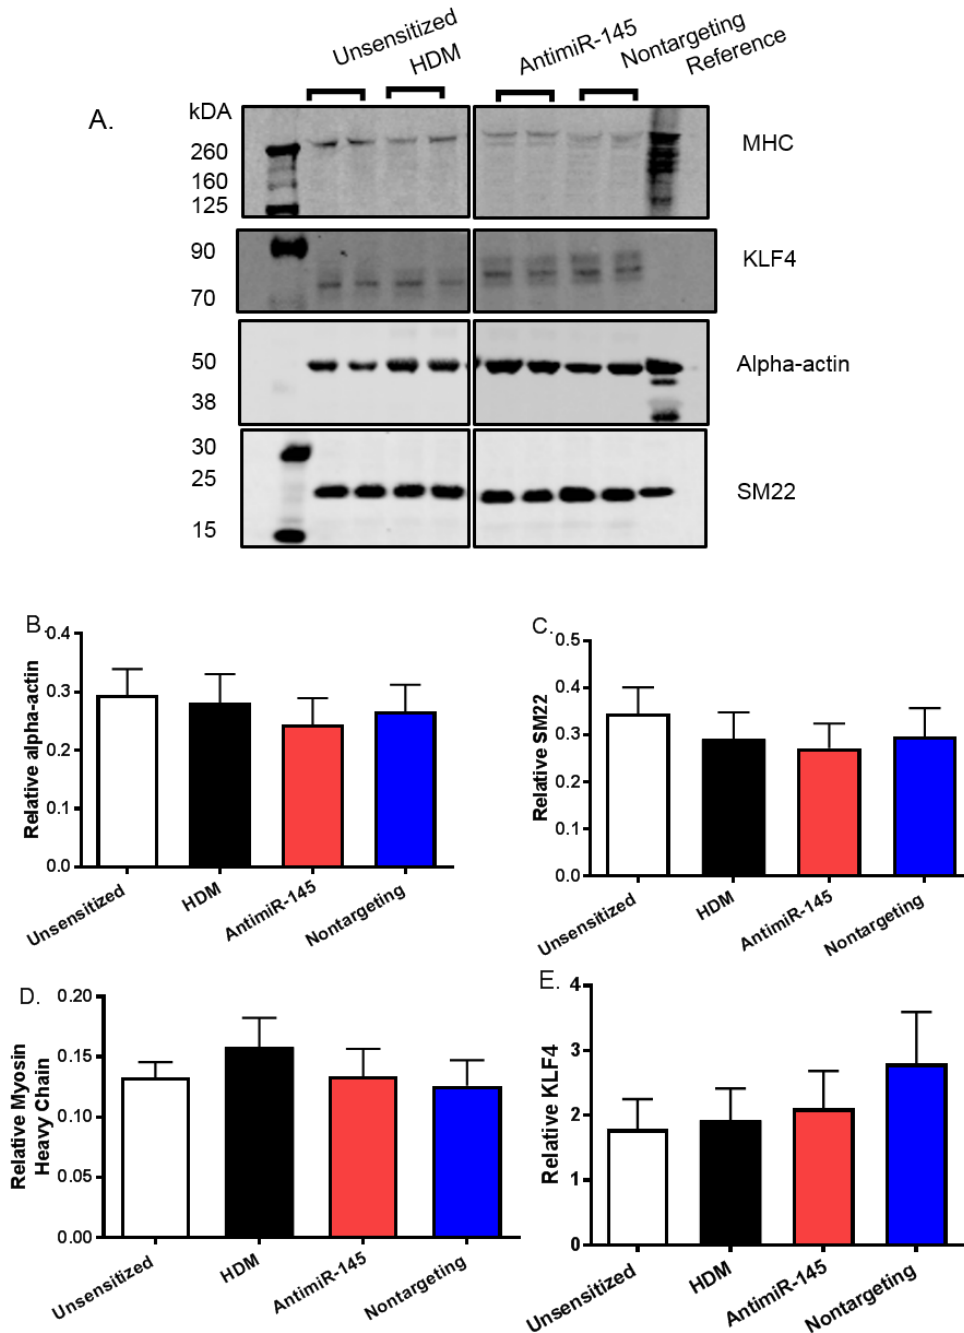

**Figure S4. AntimiR-145 does not affect smooth muscle contractile protein abundance in the lung.** Representative Immunoblots of protein from the lungs of mice were probed for contractile proteins (A). Quantitation of immunoblots for contractile proteins in all mice: (B) alpha-actin, (C), SM22, (D), myosin heavy chain, MHC and (E) KLF4. Human tracheal smooth muscle extract was used as a reference for quantitation. Results are mean  $\pm$  SEM. Statistical analyses was performed by One-way ANOVA with Dunnett's post hoc test, \*  $p \leq 0.05$  comparing HDM vs antimiR-145 and HDM vs saline. N 10-11.

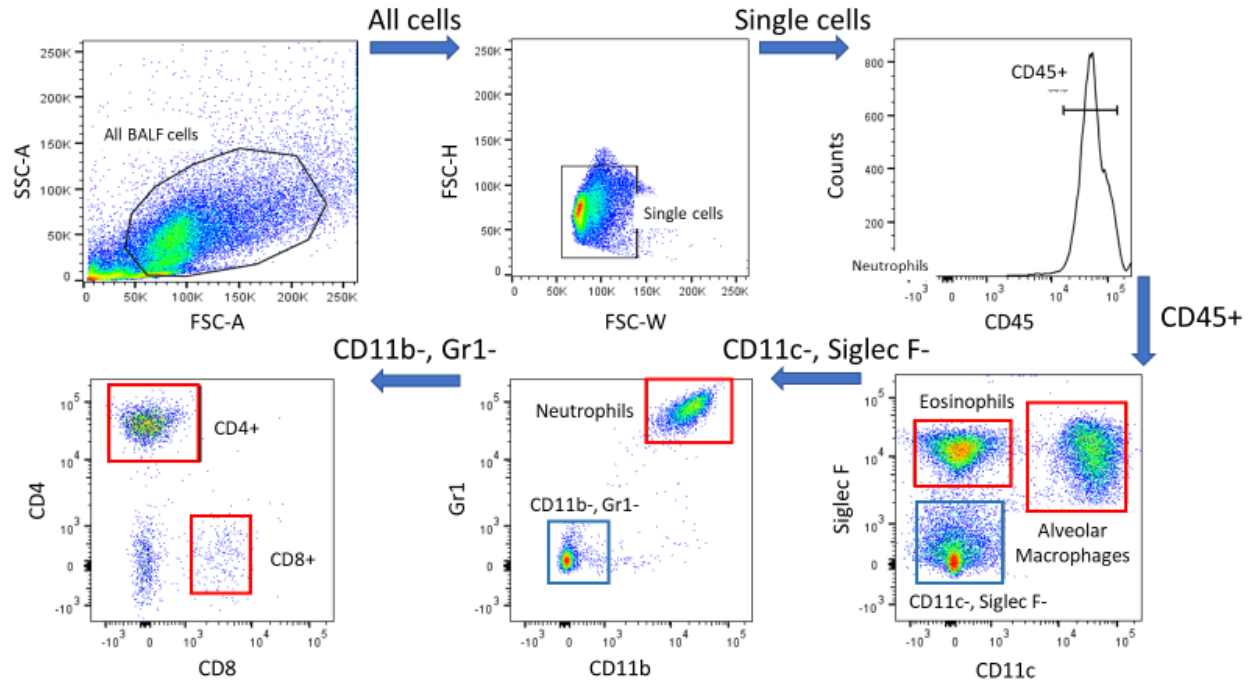

**Figure S5. Gating scheme to identify cells in the bronchoalveolar lavage.** Red gates indicate a terminal gate (cell population). Blue gates indicate non-terminal populations further gated as indicated by the labeled arrow of corresponding color.

**Table S1. Antibodies and conjugates used in the BAL cell staining cocktail.**

| <b>Target</b> | <b>Clone</b> | <b>Conjugate</b> | <b>Company</b>                    |
|---------------|--------------|------------------|-----------------------------------|
| Fc Receptor   | 2.4G2        | ----             | Bio X Cell, Lebanon, NH, USA      |
| CD11b         | M1/70        | Pac Blue         | BD Biosciences, San Jose, CA, USA |
| CD11c         | N418         | Brilliant Violet | Biolegend, San Diego, CA, USA     |
| Gr1           | RB6-8C5      | FITC             | BD PHarmigen, BD Biosciences      |
| CD45          | 30-F11       | PE               | BD Biosciences                    |
| CD4           | Gk1.5        | PE-Cy7           | eBiosciences, San Diego, CA, USA  |
| CD8           | 53-6.7       | APC-Cy7          | BD Biosciences                    |
| CD68          | FA-11        | PerCP-Cy5.5      | Biolegend                         |
| Siglec F      | E50-2440     | APC              | BD Biosciences                    |

**Table S2. Antibodies and conjugates used in the compensation controls.**

| <b>Target</b> | <b>Clone</b> | <b>Conjugate</b> | <b>Company</b> |
|---------------|--------------|------------------|----------------|
| B220          | R43-6B2      | Pac Blue         | BD Pharmigen   |
| B220          | R43-6B2      | SA-Amcyan        | BD Biosciences |
| B220          | R43-6B2      | FITC             | eBiosciences   |
| B220          | R43-6B2      | PE               | BD Pharmigen   |
| CD19          | eBio 103     | PE-Cy7           | eBiosciences   |
| CD19          | 1D3          | APC-Cy7          | BD pharmigen   |
| B220          | R43-6B2      | PerCP-Cy5.5      | eBiosciences   |
| B220          | ----         | APC              | BD Pharmigen   |



**Table S3. Primers used in RT-PCR and accession numbers of RT-PCR targets**

| mRNA      | Forward (F)                    | Tm (°C) | Reverse (R)                   | Tm (°C) |
|-----------|--------------------------------|---------|-------------------------------|---------|
| Muc5ac    | CAA CCT CCT CTC TTG ACA AC     | 54.81   | GGC GAC TGG TGC TAT T         | 55.06   |
| Muc5b     | CCT CAA GAC CTC ATA CC         | 55.13   | GTC CAA AGT CCA CAT TAC       | 55.13   |
| IL-4      | GAC GGC ACA GAG CTA TTG AT     | 54.78   | CTC ACT CTC TGT GGT CTT C     | 62      |
| IL-5      | TGA AGT GCT GGA GAT GGA AC     | 54.72   | GCT AGG AGA AAG GAT GCT AAG G | 54.78   |
| IL-13     | GGA TTC CCT GAC CAA CAT CTC    | 55.19   | AGG GAT GGT CTC TCC TCA TT    | 54.87   |
| IL-17a    | CAA CCT CCT CTC TTG ACA CTA AC | 54.81   | GGC GAC TGG TGC TGA TAT T     | 55.06   |
| Eotaxin-1 | GCA GCA TGG TAT GGA GTG T      | 55.08   | TAT CCT CTG GGT CCT GTA GAT G | 54.96   |
| Hprt      | CCC CAA AAT GGT TAA GGT TGC    | 54.76   | AAC AAA GTC TGG CCT GTA TCC   | 54.86   |
|           |                                |         |                               |         |
|           | <b>Ensembl Gene ID</b>         |         |                               |         |
| Muc5ac    | ENSMUSG00000037974             |         |                               |         |
| Muc5b     | ENSMUSG00000066108             |         |                               |         |
| IL-4      | ENSMUSG00000000869             |         |                               |         |
| IL-5      | ENSMUSG00000036117             |         |                               |         |
| IL-13     | ENSMUSG00000020383             |         |                               |         |
| IL-17a    | ENSMUSG00000025929             |         |                               |         |
| Eotaxin-1 | ENSMUSG00000020676             |         |                               |         |
| Hprt      | ENSMUSG00000025630             |         |                               |         |

**Table S4. Validated miR-145 targets and functions relevant to lung remodeling**

| <b>Cell type</b>  | <b>Targets</b>                                | <b>Functional effect</b>                                           | <b>Reference</b> |
|-------------------|-----------------------------------------------|--------------------------------------------------------------------|------------------|
| Smooth muscle     | KLF4/5<br>Fascin                              | ↑ contractile proteins<br>↓ proliferation and motility             | 46<br>66<br>67   |
| Endothelial cells | JAM-A                                         | ↓ atherosclerotic lesions                                          | 68               |
| Epithelial cells  | CFTR                                          | ↓ CFTR protein                                                     | 69<br>70         |
| Immune cells      | PDE8A (macrophages)<br>PBMCs<br>CTLA-4 (Treg) | Modifies HIV replication<br>↑ cell content of miR-145<br>Undefined | 71<br>72<br>73   |
| Stem cells        | OCT4, SOX2, KLF4<br>Dab2                      | ↓ pluripotency<br>↓ Wnt/β catenin activity                         | 74, 75           |
